# Supplementary material
Source: Elsevier journal article supplement (https://www.sciencedirect.com/science/article/pii/S1138359318304301)
Supplement: mmc1 [file S1138359318304301:mmc1.docx]

**APÉNDICE A**

**Andalucía Oriental**

- José L. Delgado. Cardiología. Hospital Carlos Haya. Málaga.
- José Cobo Muñoz. Urgencias. Hospital Ciudad de Jaén.
- Luciano López Jiménez. Medicina Interna. Hospital Reina Sofía. Córdoba.
- Francisco Temboury Ruiz. Urgencias. Hospital Clínico Universitario. Málaga.
- Carlos de La Cruz Cosme. Neurología. Hospital Clínico Universitario. Málaga.

**País Vasco**

- Víctor Expósito. Cardiología. Hospital Universitario Valdecilla. Santander.
- Jaime Gállego. Neurología. Complejo Hospitalario de Navarra. Pamplona.
- Jesús Ángel Loza. Hematología. Hospital Txagorritxu. Álava.
- Eloy Sánchez. Medicina Interna. Hospital de Donosti.
- Mercedes Varona. Urgencias. Hospital de Basurto.

**Castilla-La Mancha**

- Tomas Segura. Neurología. Complejo Hospitalario Universitario de Albacete.
- Manuel Rayo. Cardiología. Hospital General Universitario de Ciudad Real.
- José Antonio Nieto. Medicina Interna. Hospital Virgen de la Luz. Cuenca.
- Jorge Cuesta. Hematología. Centro Hospitalario Virgen de la Salud. Toledo.

**Madrid**

- Ignacio Fernández Lozano. Cardiología. Hospital Universitario Puerta de Hierro. Madrid.
- Manuel Martínez-Sellés. Cardiología. Hospital Gregorio Marañón. Madrid.
- Jaime Masjuan. Neurología. Hospital Ramón y Cajal. Madrid.
- Blanca Fuentes. Neurología. Hospital La Paz. Madrid.
- Carmen Fernández-Capitán. Medicina Interna. Hospital La Paz. Madrid
- Jorge Gómez-Cerezo. Medicina Interna. Hospital Infanta Sofía. Madrid
- Isabel Egocheaga. Atención Primaria. Centro de Salud Isla de Oza. Madrid.
- Pilar Llamas. Hematología. Fundación Jiménez Díaz. Madrid.
- Alfonso Martín. Urgencias. Hospital Universitario Severo Ochoa. Leganés.
- Gema Baldominos Utrilla Farmacia. Hospital Príncipe de Asturias. Alcalá de Henares.

**Barcelona**

- Jaime Aboal. Cardiología. Hospital Josep Trueta. Girona.
- Dolores Cocho. Neurología. Hospital de Granollers.
- Mariano de la Figuera. Atención Primaria. CAP Cerdeña, Barcelona.
- Francesc Formiga. Medicina Interna. Hospital de Bellvitge. Hospitalet del Llobregat.
- Xavier García-Moll. Cardiología. Hospital de Santa Creu i Sant Pau. Barcelona.
- Cristina Marzo. Hematología. Hospital Arnau de Vilanova de Lleida.
- Sixto Ruiz Olivares. Medicina Interna. Hospital de Inca.

**Andalucía Occidental/Extremadura**

- Domingo Marzal Martín. Cardiología. Hospital de Mérida.
- Manuel Beltrán Robles. Medicina Interna: Hospital Virgen del Camino. Sanlúcar de Barrameda.
- Francisco Javier Rodríguez Martorell. Hematología. Hospital Universitario Virgen del Rocío. Sevilla.
- Francisco Moniche Álvarez. Neurología. Hospital Universitario Virgen del Rocío. Sevilla
- Ricardo Ferreiro Almeda. Farmacéutico. Delegación Territorial De Salud. Sevilla

**Levante**

- José Pérez Silvestre. Medicina Interna. Hospital General Universitari de València.
- José Luís Ibáñez Criado. Cardiología. Hospital General Universitario de Alicante.
- Juan José Cerezo Manchado. Hematología. Hospital Clínico Universitario Virgen de la Arrixaca. Murcia.
- José Miguel Pons Amate. Neurología. Hospital General Universitari de València.
- Ricardo Gil Edo. Urgencias. Hospital Universitari de La Plana. Vila-Real.
- Javier Montoro. Atención Primaria. C.S. Guillem De Castro. Valencia
- Antonio Fornos Garrigós. Atención Primaria. Hospital General Universitari de València.

**Castilla y León**

- Carlos Aguilar Franco. Hematología. Hospital Santa Bárbara. Soria.
- Juan Francisco Arenillas Lara. Neurología. Hospital Clínico Universitario de Valladolid.
- Jose Luís Almudí Alegre. Atención Primaria. Centro de Salud de Peñafiel.
- Francisco Callado Moro. Urgencias. Hospital Universitario de Burgos.
- Javier Jiménez Candil. Cardiología. Hospital Universitario de Salamanca.
- Demetrio Sánchez-Fuentes. Medicina Interna. Complejo Asistencial de Ávila.

**Galicia/Asturias**

- Alfonso Varela Román. Cardiología. C.H.U. Santiago de Compostela.
- José María Fernandez Rodríguez. Medicina Interna. Hospital Público Carmen y Severo Ochoa. Cangas de Narcea.
- María Ferreiro Argüelles. Hematología. Complexo Hospitalario de Pontevedra.
- María del Mar Castellanos Rodrigo. Neurología. Hospital A Coruña. A Coruña.
- Daniel Rey Aldana. Atención Primaria. CSA Estrada. Pontevedra.
- José Santaló Ríos. Farmacéutico. Subdirección de Farmacia. Vigo.

**Aragón**

- María Bestué. Neurología. Hospital San Jorge. Huesca.
- María Victoria Fustero. Atención Primaria. Centro de Salud Maria de Huerva. Zaragoza.
- Joaquín Gómez. Urgencias. Hospital Clínico Universitario Lozano Blesa. Zaragoza
- Juan Pablo Gomollón. Cardiología. Hospital Universitario Miguel Servet. Zaragoza
